# Supplementary material
Source: publisher figshare collection journal article supplement (https://sage.figshare.com/ndownloader/files/22708673)
Supplement: Supplementary file 1 [file 22708673]

## Factor 2: I am what I am

| -5                                                     | -4                                                     | -3                                                                   | -2                                                                           | -1                                                        | 0                                                                                  | 1                                                                  | 2                                                       | 3                                                    | 4                                                                | 5                                             |
|--------------------------------------------------------|--------------------------------------------------------|----------------------------------------------------------------------|------------------------------------------------------------------------------|-----------------------------------------------------------|------------------------------------------------------------------------------------|--------------------------------------------------------------------|---------------------------------------------------------|------------------------------------------------------|------------------------------------------------------------------|-----------------------------------------------|
| 13. Selfies show an ideal self rather than a real self | 14. Selfies are a bid for approval                     | 18. Selfies are a way of seeking confirmation that your life is good | 22. Selfies are a way of shaping how you look and hopefully how you are seen | 36. Selfies equal 'best look'                             | 8. Posting lots of selfies is acceptable in this digital age                       | 20. Selfies are a way to share experiences with friends and family | 41. Selfies open the door to abuse                      | 45. Selfies say 'I'm proud of this'                  | 42. Selfies provide a taste of what it is like to be a celebrity | 38. Selfies help you empathise with others    |
| 29. Selfies bear little resemblance to real life       | 6. Millennials (people your age) are all about selfies | 26. Selfies are manipulative                                         | 12. Selfie posting is a symptom of the need for love                         | 9. Posting selfies is a way to feel better about yourself | 10. Posting selfies is about being less confident                                  | 2. A selfie is an expression of who you are                        | 32. Selfies capture meaningful moments                  | 46. Selfies tell the world 'I am important'          | 44. Selfies say 'I love my life'                                 | 35. Selfies display humanity at its very best |
|                                                        | 47. People can be judgmental about selfies             | 1. Getting a lot of likes makes you feel good about yourself         | 30. Selfies can boost self esteem                                            | 39. Selfies make you feel like you are in the spotlight   | 17. Selfies are a way of saying 'This is who I am'                                 | 3. Filters are part of presenting your best self to the world      | 33. Selfies communicate the message "I value myself".   | 37. Selfies can help you feel like you are not alone | 5. Filters can make you look more like yourself                  |                                               |
|                                                        |                                                        | 21. Selfies are about getting recognition from others                | 27. Selfies are narcissistic (e.g. all about how much you love yourself)     | 34. Group selfies show the connections between people     | 31. Selfies can speak to many with a single picture                                | 25. Selfies are just fun!                                          | 28. Selfies are just about what you're doing day to day | 16. Selfies are a way of getting feedback on outfits |                                                                  |                                               |
|                                                        |                                                        |                                                                      | 24. Selfies are better when they are of a group                              | 7. Once you post a selfie, it's not yours anymore         | 15. Selfies are a good way to show support for a cause (e.g. no makeup selfies for | 23. Selfies are an invitation for opinions                         | 43. Selfies reassure us that we are who we think we are |                                                      |                                                                  |                                               |
|                                                        |                                                        |                                                                      |                                                                              | 11. Posting selfies is just part of everyday life online  | 4. Filters are part of the fun of selfies                                          | 19. Selfies are a way of sharing feelings                          |                                                         |                                                      |                                                                  |                                               |
|                                                        |                                                        |                                                                      |                                                                              |                                                           | 40. Selfies make you look popular                                                  |                                                                    |                                                         |                                                      |                                                                  |                                               |
